1           Broad anti-coronaviral activity of FDA approved drugs against  
2                           SARS-CoV-2 *in vitro* and SARS-CoV *in vivo*

3  
4   **Stuart Weston<sup>1</sup>, Christopher M. Coleman<sup>1†</sup>, Jeanne M. Sisk<sup>1</sup>, Rob Haupt<sup>1</sup>, James Logue<sup>1</sup>,**  
5   **Krystal Matthews<sup>1</sup> and Matthew B. Frieman<sup>\*1</sup>**

6   1 - Department of Microbiology and Immunology, University of Maryland School of Medicine,  
7   685 W. Baltimore St., Room 380, Baltimore, MD, 21201, USA

8   \*Corresponding author. Email: [MFrieman@som.umaryland.edu](mailto:MFrieman@som.umaryland.edu)

9   <sup>†</sup>Current address: School of Life Sciences, University of Nottingham, Queen's Medical Centre,  
10   Nottingham, NG7 2UH, United Kingdom

11  
12   **Key words:** SARS-CoV-2, nCoV-2019, COVID-19, coronavirus, drug repurposing, FDA  
13   approved drugs, antiviral therapeutics, pandemic, chloroquine, hydroxychloroquine,  
14   chlorpromazine

15  
16   **Abstract**

17   SARS-CoV-2 emerged in China at the end of 2019 and has rapidly become a pandemic with  
18   roughly 2.7 million recorded COVID-19 cases and greater than 189,000 recorded deaths by  
19   April 23rd, 2020 ([www.WHO.org](http://www.WHO.org)). There are no FDA approved antivirals or vaccines for any  
20   coronavirus, including SARS-CoV-2. Current treatments for COVID-19 are limited to supportive  
21   therapies and off-label use of FDA approved drugs. Rapid development and human testing of  
22   potential antivirals is greatly needed. A quick way to test compounds with potential antiviral  
23   activity is through drug repurposing. Numerous drugs are already approved for human use and  
24   subsequently there is a good understanding of their safety profiles and potential side effects,

25 making them easier to fast-track to clinical studies in COVID-19 patients. Here, we present data  
26 on the antiviral activity of 20 FDA approved drugs against SARS-CoV-2 that also inhibit SARS-  
27 CoV and MERS-CoV. We found that 17 of these also inhibit SARS-CoV-2 at a range of IC50  
28 values at non-cytotoxic concentrations. We directly follow up with 7 of these to demonstrate all  
29 are capable of inhibiting infectious SARS-CoV-2 production. Moreover, we have evaluated two  
30 of these, chloroquine and chlorpromazine *in vivo* using a mouse-adapted SARS-CoV model and  
31 found both drugs protect mice from clinical disease.

32

### 33 **Introduction**

34 At the end of December 2019, reports started to emerge from China of patients suffering from  
35 pneumonia of unknown etiology. By early January, a new coronavirus had been identified and  
36 determined as the cause (1). Since then, the virus originally known as novel coronavirus 2019  
37 (nCoV-2019), now severe acute respiratory syndrome coronavirus 2 (SARS-CoV-2), has spread  
38 around the world. As of April 23<sup>th</sup>, 2020, there have been roughly 2.7 million confirmed cases of  
39 COVID-19 (the disease caused by SARS-CoV-2 infection) with over to 189,000 recorded deaths  
40 ([www.WHO.org](http://www.WHO.org)). Multiple countries have enacted social distancing and quarantine measures,  
41 attempting to reduce person-to-person transmission of the virus. Healthcare providers lack  
42 pharmaceutical countermeasures against SARS-CoV-2, beyond public health interventions, and  
43 there remains a desperate need for rapid development of antiviral therapeutics. A potential route  
44 to candidate antivirals is through repurposing of already approved drugs (for reviews; (2–4) and  
45 for examples;(5–8). We have previously screened a library of FDA approved drugs for antiviral  
46 activity against two other highly pathogenic human coronaviruses, SARS-CoV and Middle East  
47 respiratory syndrome coronavirus (MERS-CoV)(6). We found 27 drugs that inhibited replication  
48 of both of these coronaviruses, suggesting that they may have broad anti-coronaviral activity.  
49 One of the hits from this work was imatinib with which we subsequently determined the

50 mechanism of action by demonstrating this drug inhibits fusion of coronaviruses with cellular  
51 membranes, thus blocking entry (9, 10).

52

53 Here, we present our investigation of 20 priority compounds from our previous screening to test  
54 if they can also inhibit SARS-CoV-2. Since these compounds are already approved for use in  
55 humans, they make ideal candidates for drug repurposing and rapid development as antiviral  
56 therapeutics. Our work found that 17 of the 20 of the drugs that inhibited SARS-CoV and  
57 MERS-CoV could also inhibit SARS-CoV-2, with similar IC<sub>50</sub> values. We further assessed a  
58 subset of these drugs for their effects on SARS-CoV-2 RNA and infectious virus production and  
59 found all to have inhibitory activity. Our screening based on cytopathic effect therefore appears  
60 a favorable approach to find drugs capable of inhibiting production of infectious virus. Currently  
61 there are no established small animal model systems for SARS-CoV-2. However, there is a  
62 well-established mouse-adapted system for SARS-CoV (MA15 strain(11)) and we present data  
63 here assessing the *in vivo* efficacy of chloroquine (CQ) and chlorpromazine (CPZ) against  
64 SARS-CoV. We found that drug treatment does not inhibit virus replication in mouse lungs, but  
65 significantly improves clinical outcome. Based on both of these drugs inhibiting SARS-CoV-2  
66 infection *in vitro* and providing protection *in vivo* against SARS-CoV clinical disease we believe  
67 they may be beneficial for SARS-CoV-2 therapy.

68

## 69 **Materials and Methods**

### 70 **Cell lines and virus**

71 Vero E6 cells (ATCC# CRL 1586) were cultured in DMEM (Quality Biological), supplemented  
72 with 10% (v/v) fetal bovine serum (Sigma), 1% (v/v) penicillin/streptomycin (Gemini Bio-  
73 products) and 1% (v/v) L-glutamine (2 mM final concentration, Gibco). Cells were maintained at  
74 37°C and 5% CO<sub>2</sub>. Samples of SARS-CoV-2 were obtained from the CDC following isolation

75 from a patient in Washington State (WA-1 strain - BEI #NR-52281). Stocks were prepared by  
76 infection of Vero E6 cells for two days when CPE was starting to be visible. Media were  
77 collected and clarified by centrifugation prior to being aliquoted for storage at -80°C. Titer of  
78 stock was determined by plaque assay using Vero E6 cells as described previously (12). All  
79 work with infectious virus was performed in a Biosafety Level 3 laboratory and approved by our  
80 Institutional Biosafety Committee. SARS-CoV stock was prepared as previously described (13).  
81 SARS-CoV spike (S) psuedotype viruses were produced as previously described (9).

82

### 83 **Drug testing**

84 All drug screens were performed with Vero E6 cells. Cells were plated in opaque 96 well plates  
85 one day prior to infection. Drug stocks were made in either DMSO, water or methanol. Drugs  
86 were diluted from stock to 50 µM and an 8-point 1:2 dilution series made. Cells were pre-treated  
87 with drug for 2 hour (h) at 37°C/5% CO<sub>2</sub> prior to infection at MOI 0.01 or 0.004. Vehicle controls  
88 were used on every plate, and all treatments were performed in triplicate for each screen. In  
89 addition to plates that were infected, parallel plates were left uninfected to monitor cytotoxicity of  
90 drug alone. Three independent screens with this set-up were performed. Cells were incubated  
91 at 37°C/5% CO<sub>2</sub> for 3 days before performing CellTiter-Glo (CTG) assays as per the  
92 manufacturer's instruction (Promega). Luminescence was read using a Molecular Devices  
93 Spectramax L plate reader. Fluphenazine dihydrochloride, benztropine mesylate, amodiaquine  
94 hydrochloride, amodiaquine dihydrochloride dihydrate, thiethylperazine maleate, mefloquine  
95 hydrochloride, triparanol, terconazole vetranal, anisomycin, fluspirilene, clomipramine  
96 hydrochloride, hydroxychloroquine sulfate, promethazine hydrochloride, emetine dihydrochloride  
97 hydrate and chloroquine phosphate were all purchased from Sigma. Chlorpromazine  
98 hydrochloride, toremifene citrate, tamoxifen citrate, gemcitabine hydrochloride and imatinib  
99 mesylate were all purchased from Fisher Scientific.

100

## 101 **Data analysis**

102 Cytotoxicity (%TOX) data was normalized according to cell-only uninfected (cell only) controls  
103 and CTG-media-only (blank) controls:

$$\%TOX = \left( 1 - \frac{(drug) - (blank)}{(cell\ only) - (blank)} \right) \times 100$$

104 Inhibition (%Inhibit) data was normalized according to cell only and the activity of the vehicle  
105 controls:

$$\%Inhibit = \frac{(drug) - (vehicle)}{(cell\ only) - (vehicle)} \times 100$$

106 Nonlinear regression analysis was performed on the normalized %inhibit and %TOX data and  
107 IC50s and CC50s were calculated from fitted curves (log [agonist] versus response - variable  
108 slope [four parameters]) (GraphPad Software, LaJolla, CA), as described previously  
109 (Dyall2018). Drug dilution points in a given run were excluded from IC50 analysis if the average  
110 cytotoxicity was greater than 30% (arbitrary cutoff) across the 3 cytotoxicity replicates for that  
111 screen. IC50 or CC50 values extrapolated outside the drug dilution range tested were reported  
112 as greater than 50µM or less than 0.39µM. Selectivity indexes (SI) were also calculated by  
113 dividing the CC50 by the IC50.

114

## 115 **Viral infection**

116 To further analyse candidate drugs, Vero E6 cells were grown in 24 well plate format for 24 h  
117 prior to infection. As with the drug screens, cells were pre-treated with drug at a range of  
118 concentrations, or vehicle control for 2 h. Cells were then infected with SARS-CoV-2 at MOI 0.1  
119 for 24 hour (h). Supernatant was collected, centrifuged in a table-top centrifuge for 3 minutes  
120 (min) at max speed and stored at -80°C. After a wash in PBS, infected cells were collected in

121 TRIZol (Ambion) for RNA analysis (described below). Supernatant was used to titer viral  
122 production by TCID<sub>50</sub> assay (12).

123

#### 124 **RNA extraction and qRT-PCR**

125 RNA was extracted from TRIZol samples using Direct-zol RNA miniprep kit (Zymo Research) as  
126 per the manufacturer's instructions. RNA was converted to cDNA using RevertAid RT Kit  
127 (Thermo Scientific), with 12 µl of extracted RNA per reaction. For qRT-PCR, 2 µl of cDNA  
128 reaction product was mixed with PowerUp SYBR Green Master Mix (Applied Biosystems) and  
129 WHO/Corman primers targeting N and RdRp: N FWD 5'-CACATTGGCACCCGCAATC-3', N  
130 REV 5'-GAGGAACGAGAAGAGGCTTG-3', RdRp FWD 5'GTGARATGGTCATGTGTGGCGG-  
131 3', RdRp REV 5'-CARATGTTAAASACACTATTAGCATA-3'. The qRT-PCR reactions were  
132 performed with a QuantStudio 5 (Applied Biosystems). To normalize loading, 18S RNA was  
133 used as a control, assessed with TaqMan Gene Expression Assays (Applied Biosystems) and  
134 TaqMan Fast Advanced Master Mix. Fold change between drug treated and vehicle control was  
135 determined by calculating  $\Delta\Delta CT$  after normalization to the endogenous control of 18S.

136

137

#### 138 **Pseudovirus fusion/entry assay**

139 The pseudovirion (PV) entry assay was performed as described (9, 14). Briefly,  $2 \times 10^4$  BSC1  
140 cells per well were in 96-well plates for 24 h, after which time cells were pre-treated with drug (1  
141 h) and infected with PV (3 h). Media was removed and cells were washed with loading buffer  
142 (47 ml clear DMEM, 5 mM Probenecid, 2 mM L-glutamine, 25 mM HEPES, 200 nM bafilomycin,  
143 5 µM E64D) and incubated for 1 h in CCF2 solution (LB, CCF2-AM, Solution B [CCF2-AM kit  
144 K1032] Thermo Fisher) in the dark. Cells were washed once with loading buffer and incubated  
145 from 6 h to overnight with 10% FBS in loading buffer. Percentage CCF2 cleavage was assessed

146 by flow cytometry on the LSRII (Beckton Dickinson) in the flow cytometry core facility at the  
147 University of Maryland, Baltimore. Data were analyzed using FlowJo.

148

#### 149 **Mouse infections.**

150 All infections were performed in an animal biosafety level 3 facility at the University of Maryland,  
151 Baltimore, using appropriate practices, including a HEPA-filtered bCON caging system, HEPA-  
152 filtered powered air-purifying respirators (PAPRs), and Tyvek suiting. All animals were grown to  
153 10 weeks of age prior to use in experiments. The animals were anesthetized using a mixture of  
154 xylazine (0.38 mg/mouse) and ketamine (1.3 mg/mouse) in a 50  $\mu$ l total volume by  
155 intraperitoneal injection. The mice were inoculated intranasally with 50  $\mu$ l of either PBS or 2.5 x  
156  $10^3$  PFU of rMA15 SARS-CoV (11) after which all animals were monitored daily for weight loss.  
157 Mice were euthanized at day 4 post-infection, and lung tissue was harvested for further  
158 analysis. All animals were housed and used in accordance with the University of Maryland,  
159 Baltimore, Institutional Animal Care and Use Committee guidelines.

160

#### 161 **Plaque assay.**

162 Vero cells were seeded in 35 mm dishes with  $5 \times 10^5$  cells per dish 24 h prior to  
163 infection. Supernatants from homogenized were serially diluted  $10^{-1}$  through  $10^{-6}$  in serum-free  
164 (SF) media. Cells were washed with SF media, 200  $\mu$ l of diluted virus was added to each well  
165 and adsorption was allowed to proceed for 1 h at 37°C with gentle rocking every 10 min. 2X  
166 DMEM and 1.6% agarose were mixed 1:1. Cells were washed with SF media, 2 ml DMEM-  
167 agarose was added to each well, and cells were incubated for 72 h at 37°C, after which time  
168 plaques were read.

169

170

#### 171 **Results**

## 172 **Screening FDA approved compounds for anti-SARS-CoV-2 activity**

173 Previously, we performed a large-scale drug screen on 290 FDA approved compounds to  
174 investigate which may have antiviral activity against SARS-CoV and MERS-CoV (6). With the  
175 emergence of SARS-CoV-2, we prioritized testing 20 of the 27 hits that were determined to  
176 inhibit both of the previously tested coronaviruses for antiviral activity against the novel virus.  
177 The list of tested compounds is shown in Table 1. Our screening started at 50  $\mu$ M and used an  
178 8-point, 1:2 dilution series with infections being performed at either MOI 0.01 or 0.004. CellTiter-  
179 Glo (CTG) assays were performed 3 days post-infection to determine relative cell viability  
180 between drug and vehicle control treated cells. Uninfected samples were used to measure the  
181 cytotoxicity of drug alone. From the relative luminescence data of the CTG assay, percent  
182 inhibition (of cell death caused by viral infection) could be measured and plotted along with the  
183 percent cytotoxicity of drug alone. Fig. 1 shows these plotted graphs from one representative of  
184 three independent screens at MOI 0.01. For those drugs demonstrating a cell toxicity rate lower  
185 than 30%, we were able to calculate IC<sub>50</sub> values at both MOI from these graphs for 17 of the 20  
186 drugs which is summarized in Table 1.

187

## 188 **Drug screen validation**

189 In order to validate our screening process as a means to determine compounds with antiviral  
190 effect we decided to follow up with a subset of drugs. Chloroquine (CQ) has become the source  
191 of much interest as a potential treatment for COVID19 (15), as such, we further investigated  
192 hydroxychloroquine (HCQ) and CQ as both were present in our screen (Table 1). Vero E6 cells  
193 were plated and pre-treated with drug for 2 h prior to infection with SARS-CoV-2 at MOI 0.1.  
194 Supernatant was collected 24 h post-infection to determine titer of virus by TCID<sub>50</sub> assay and  
195 cells were collected in TRIzol to assess production of viral mRNA. Treatment with both drugs  
196 caused a significant reduction in viral mRNA levels, especially at higher concentrations, without  
197 drug induced cytotoxicity (Fig. 1 and Table 1). There was a significant decrease in relative



198 expression levels of both RdRp and N mRNA across the range of concentrations used (Fig. 2A-  
199 D). Along with causing a reduction in viral mRNA, treatment with both drugs caused a significant  
200 reduction in viral replication (Fig. 2E and 2F). SARS-CoV-2 production was more sensitive to  
201 HCQ than CQ with larger inhibition seen at the same concentration of treatment, which is in  
202 agreement with HCQ having a lower IC50 in our cell viability assay (Table 1). We also  
203 performed a time of addition assay with the highest concentration of HCQ to investigate whether  
204 SARS-CoV-2 entry was the point of inhibition of this compound (Fig. 2G). Interestingly, while the  
205 addition of HCQ at 2h post-infection did have some reduction in inhibitory activity but there was  
206 not a complete loss, suggesting that HCQ treatment may impact other stages of the viral life  
207 cycle than just entry.

208  
209 We have previously used a  $\beta$ -lactamase-Vpr chimeric protein (Vpr-BlaM) pseudotype system to  
210 demonstrate that imatinib (a drug also seen to inhibit SARS-CoV-2 [Table 1 and Fig. 1]) inhibits  
211 SARS-CoV and MERS-CoV spike-mediated entry (9). We used this system to more directly  
212 investigate whether CQ could inhibit viral entry mediated by coronavirus spike, and additionally  
213 included chlorpromazine (CPZ) as this is known to inhibit clathrin-mediated endocytosis (16)  
214 and was also part of our drug screening (Table 1 and Fig. 2). In this assay, when the  
215 pseudovirus fuses with a cellular membrane, BlaM is released into the cytoplasm of the infected  
216 cell. BlaM can cleave cytoplasmic loaded CCF2 to change its emission spectrum of from 520  
217 nm (green) to ~450 nm (blue), which can be quantified using flow cytometry.

218  
219 Cells were treated with CQ or CPZ for 1 h before infection with BlaM-containing SARS-S  
220 pseudovirions (PV). Cells were then analyzed by flow cytometry to quantify the cleavage of  
221 CCF2. In mock treated cells infected with SARS-S PV there was a shift in the CCF2 emission  
222 spectrum indicating release of BlaM to the cytosol, and that spike-mediated fusion with cellular  
223 had occurred. Upon treatment with CQ or CPZ there was a greater than 90% reduction in CCF2

224 cleavage caused by SARS-S PV (Fig. 2H). These data demonstrate that both drugs inhibit  
225 SARS-CoV spike-mediated fusion with cellular membranes. These psuedotype assays suggest  
226 that the inhibition of coronavirus replication caused by CQ and CPZ is at the stage of entry to  
227 cells but combined with the time of addition assays (Fig. 2G), there is a suggestion that later  
228 stages may also be impacted.

229  
230 HCQ and CQ are used as anti-malarial drugs and are in the class of aminoquinolines which are  
231 hemozoin inhibitors, similarly to 4-methanolquinolines. Interestingly, from our drug screening,  
232 three other hemozoin inhibitors were identified: amodiaquine dihydrochloride dihydrate,  
233 amodiaquine hydrochloride and mefloquine. We therefore decided to directly test these drugs  
234 for antiviral activity against SARS-CoV-2. We directly tested CPZ against SARS-CoV-2 having  
235 seen that it could inhibit SARS-CoV S-mediated entry to cells (Fig. 2H). And finally included  
236 imatinib since we have previously shown that this can inhibit entry of both SARS-CoV and  
237 MERS-CoV (9) and was a hit against SARS-CoV-2 (Fig. 1 and Table 1). Again, cells were pre-  
238 treated with drugs at the indicated concentrations and infected with SARS-CoV-2 at MOI 0.1 for  
239 24h, after which supernatant samples were collected. As can be seen in Fig. 3, at the highest  
240 concentrations of all drugs there is significant inhibition of SARS-CoV-2 infection. All 5 drugs  
241 showed very strong inhibition at 20  $\mu$ M.

242  
243 Overall, the data from Fig. 2 and Fig. 3 indicate that there are various FDA approved drugs that  
244 have broad-spectrum anti-coronavirus activity *in vitro*.

245  
246 **Chloroquine and chlorpromazine do not inhibit SARS-CoV (MA15) replication in mouse**  
247 **lungs, but significantly reduces weight loss and clinical signs**

248 CQ and CPZ treatment displayed significant inhibition of coronavirus replication *in vitro*, with our  
249 data suggesting entry is inhibited. We therefore decided to investigate whether these drugs

250 were efficacious *in vivo* using SARS-CoV strain, MA15 in BALB/c mice. This model displays  
251 ~15-20% weight loss by 4 days post infection (dpi), occasionally resulting in death. We tested  
252 whether prophylactically administered CQ or CPZ could protect mice from severe MA15  
253 infection. Mice were injected intraperitoneally with either water, 0.8 mg CQ, 1.6 mg CQ, 20 µg  
254 CPZ, 100 µg CPZ or 200 µg CPZ at day -1 of infection and then were dosed every day through  
255 the 4 days of infection. On day 0, mice were intranasally infected with  $2.5 \times 10^3$  pfu of SARS-  
256 CoV (MA15) or PBS as control. Weight loss was measured as a correlate of disease and mice  
257 were euthanized at 4 dpi for analysis.

258  
259 PBS inoculated mice showed no weight loss or clinical signs of disease when treated with either  
260 water, CQ or CPZ over the experiment time course indicating drug treatment did not adversely  
261 affect morbidity (Fig. 4A and 4D). Mice that were infected with MA15 and treated with water lost  
262 ~15% of their starting body weight over 4 days and had significant clinical signs of disease  
263 including ruffled fur, labored breathing and lethargy (Fig. 4A and 4D). Mice that were treated  
264 with 0.8 mg of CQ each day, displayed similar weight loss as the water control through the first  
265 3 days of infection, however by 4 dpi the weight loss was halted in the drug treated mice (Fig.  
266 4A). Mice that were treated with 1.6 mg CQ per day showed markedly reduced weight loss  
267 compared to the water control (Fig. 4A). Pathological analysis was also performed on H&E  
268 stained sections. Mice infected with MA15 and treated with water displayed significant  
269 inflammation and denuding bronchiolitis suggesting severe disease (Fig. 4B). By contrast, 0.8  
270 mg CQ dose group had moderate inflammation that was reduced compared to control and the  
271 1.6 mg dose group had minimal lung pathology (Fig. 4B). Interestingly, even though CQ  
272 treatment appeared to protect against weight loss and inflammation in the lungs, the viral titer  
273 was equivalent between drug treated and vehicle control mice (Fig. 4C).

274

275 Similar to the CQ results, CPZ treatment reduced weight loss in mice infected with MA15 at 100  
276  $\mu\text{g}$  and 200  $\mu\text{g}$ , but the 20  $\mu\text{g}$  treatment group were equivalent to vehicle control (Fig. 4D) and  
277 the H&E sections showed protection against inflammation and denuding bronchiolitis at the  
278 higher doses (Fig. 4E). Again, as with CQ treatment, even though there were reduced signs of  
279 infection with CPZ treatment, there was no difference in MA15 titer in the mouse lungs (Fig. 4F).  
280 Overall these data indicate that even though CQ and CPZ treatment do not inhibit viral  
281 replication in the lungs, both can protect mice from signs of disease following SARS-CoV  
282 (MA15) infection.

283

## 284 **Discussion**

285 The SARS-CoV-2 pandemic has demonstrated the desperate need for antiviral drugs. Since the  
286 emergence of SARS-CoV in 2002, research has uncovered many details of coronavirus biology  
287 and pathogenesis, however there are currently no approved therapeutics against this emerging  
288 virus family. Whether being used for treating SARS-CoV-2 in this current pandemic or the next  
289 unknown viral pathogen in the future, we must attempt to develop and validated antiviral drugs  
290 that are ready to be used at the first signs of an outbreak. Many FDA approved drugs have been  
291 found to have antiviral activity, in addition to their approved use (e.g; (5–8)) and since these are  
292 extensively used in humans for other conditions, they could be streamlined for rapid approval  
293 and repositioning as antivirals. In our previous work, 290 FDA approved drugs were screened  
294 for antiviral activity and 27 were found to inhibit both SARS-CoV and MERS-CoV (6). We  
295 prioritized testing these for antiviral activity against SARS-CoV-2 since they displayed broad-  
296 spectrum antiviral activity. From multiple independent screens performed with two MOI, we  
297 found that 17 of our 20 tested priority compounds display significant antiviral activity at non-  
298 cytotoxic concentrations. Many of the compounds have IC<sub>50</sub> values under 10  $\mu\text{M}$  and these will  
299 be the source of follow up testing on additional cell lines and in mouse models of SARS-CoV-2.

300

301 We further investigated 7 of the hits to directly test if they inhibited SARS-CoV-2 replication. We  
302 performed follow-up experiments with HCQ, CQ, amodiaquine and mefloquine because  
303 chloroquine has garnered much interest as a potential treatment for COVID19 (15) and the  
304 others are similarly used as anti-malarial compounds (17). In addition, we have previously  
305 demonstrated that imatinib is an inhibitor of SARS-CoV, MERS-CoV and infectious bronchitis  
306 virus entry to cells (9, 10) so included that here as the mechanism of coronavirus inhibition is  
307 understood. Finally, CPZ inhibits clathrin function in cells (16) so can disrupt infection by many  
308 viruses that require clathrin-mediated endocytosis and was therefore also chosen for further  
309 analysis. Treatment of cells with all these drugs showed inhibition of infectious viral particle  
310 production (measured by TCID<sub>50</sub> assay) at non-cytotoxic levels.

311  
312 Having demonstrated that HCQ, CQ and CPZ can inhibit cytopathic effect, mRNA synthesis and  
313 infectious viral particle production of SARS-CoV-2, we used a previously published system of  
314 SARS-CoV psuedotype viruses carrying Vpr-BlaM to investigate whether CQ and CPZ inhibit  
315 coronavirus spike-mediated entry to better define mechanism of action. We have previously  
316 used this system to define imatinib as an entry inhibitor of these viruses (9) and found similar  
317 results for CQ and CPZ, thus better defining their mechanism of a antiviral activity.

318  
319 Finally, we investigated the efficacy of CQ and CPZ with an *in vivo* model using SARS-CoV  
320 MA15. There is currently a lack of an established mouse model for SARS-CoV-2 so we used the  
321 mouse adapted SARS-CoV (MA15) strain as a surrogate to assess the *in vivo* efficacy of these  
322 drugs. We are of the opinion that this is a good model since both viruses use ACE2 as a  
323 receptor (18–21) and therefore have a similar cellular tropism which is important since both of  
324 these compounds appear to inhibit viral entry. Prophylactic dosing in MA15 infection  
325 experiments demonstrated that, in contrast to the *in vitro* antiviral activity, CQ and CPZ did no  
326 inhibit viral replication in mouse lungs based on viral titer recovered from lungs at 4 dpi.

327 However, both drugs resulted in reduced weight loss and improved clinical outcome, with the  
328 higher dose giving greater protection. Along with being an anti-malarial, CQ is used in humans  
329 for the treatment of systemic lupus erythematosus and rheumatoid arthritis because of anti-  
330 inflammatory properties and has effects on antigen presentation (22–24). We speculate that  
331 these properties may have a role in the protection we observe *in vivo* since much of the  
332 pathology from SARS-CoV is a consequence of immunopathology during infection (in mice;  
333 (25), in non-human primates (26) and for a detail review (27)). These results suggest that CQ  
334 alone may not be a viable therapeutic but may be beneficial for treatment of SARS-CoV-2 in  
335 combination with more directly acting antivirals such as remdesivir (28–30).

336  
337 The development of antiviral drugs for emerging coronaviruses is a global priority. In the middle  
338 of the COVID19 pandemic, we must identify rapidly accessible therapeutics that are validated in  
339 both *in vitro* and *in vivo* models. FDA approved drugs being assessed for repurposing and other  
340 experimental drugs in development must be properly validated in animal studies to best assess  
341 their potential utility in people. We have presented here a list of FDA approved drugs that are  
342 effective *in vitro* against SARS-CoV-2 as well as being effective against SARS-CoV and MERS-  
343 CoV (6). Moreover, we have demonstrated that two of these, CQ and CPZ, can protect mice  
344 from severe clinical disease from SARS-CoV. Future research will be aimed at testing these  
345 compounds in SARS-CoV-2 animal models to further assess their potential utility for human  
346 treatment.

347

### 348 **Acknowledgments**

349 We kindly thank Emergent BioSolutions for financial support to perform these experiments. We  
350 also kindly thank Julie Dyall for helpful discussions regarding data analysis.

351

### 352 **References**

- 353 1. Zhu N, Zhang D, Wang W, Li X, Yang B, Song J, Zhao X, Huang B, Shi W, Lu R, Niu P,  
354 Zhan F, Ma X, Wang D, Xu W, Wu G, Gao GF, Tan W. 2020. A novel coronavirus from  
355 patients with pneumonia in China, 2019. *N Engl J Med* 382:727–733.
- 356 2. Sisk JM, Frieman MB. 2016. Screening of FDA-Approved Drugs for Treatment of  
357 Emerging Pathogens. *ACS Infect Dis*. American Chemical Society.
- 358 3. Pushpakom S, Iorio F, Eyers PA, Escott KJ, Hopper S, Wells A, Doig A, Guilliams T,  
359 Latimer J, McNamee C, Norris A, Sanseau P, Cavalla D, Pirmohamed M. 2018. Drug  
360 repurposing: Progress, challenges and recommendations. *Nat Rev Drug Discov*.
- 361 4. Mercorelli B, Palù G, Loregian A. 2018. Drug Repurposing for Viral Infectious Diseases:  
362 How Far Are We? *Trends Microbiol* 26:865–876.
- 363 5. Madrid PB, Chopra S, Manger ID, Gilfillan L, Keepers TR, Shurtleff AC, Green CE, Iyer L  
364 V., Dilks HH, Davey RA, Kolokoltsov AA, Carrion R, Patterson JL, Bavari S, Panchal RG,  
365 Warren TK, Wells JB, Moos WH, Burke RLL, Tanga MJ. 2013. A Systematic Screen of  
366 FDA-Approved Drugs for Inhibitors of Biological Threat Agents. *PLoS One* 8.
- 367 6. Dyall J, Coleman CM, Hart BJ, Venkataraman T, Holbrook MR, Kindrachuk J, Johnson  
368 RF, Olinger GG, Jahrling PB, Laidlaw M, Johansen LM, Lear-rooney CM, Glass PJ,  
369 Hensley LE, Frieman B. 2014. Repurposing of Clinically Developed Drugs for Treatment  
370 of Middle East Respiratory Syndrome Coronavirus Infection. *Antimicrob Agents*  
371 *Chemother* 58:4885–4893.
- 372 7. Madrid PB, Panchal RG, Warren TK, Shurtleff AC, Endsley AN, Green CE, Kolokoltsov A,  
373 Davey R, Manger ID, Gilfillan L, Bavari S, Tanga MJ. 2016. Evaluation of Ebola Virus  
374 Inhibitors for Drug Repurposing. *ACS Infect Dis* 1:317–326.
- 375 8. Xu M, Lee EM, Wen Z, Cheng Y, Huang WK, Qian X, Tcw J, Kouznetsova J, Ogden SC,  
376 Hammack C, Jacob F, Nguyen HN, Itkin M, Hanna C, Shinn P, Allen C, Michael SG,  
377 Simeonov A, Huang W, Christian KM, Goate A, Brennand KJ, Huang R, Xia M, Ming GL,  
378 Zheng W, Song H, Tang H. 2016. Identification of small-molecule inhibitors of Zika virus

- 379 infection and induced neural cell death via a drug repurposing screen. *Nat Med* 22:1101–  
380 1107.
- 381 9. Coleman CM, Sisk JM, Mingo RM, Nelson EA, White JM, Frieman MB. 2016. Abl Kinase  
382 Inhibitors Are Potent Inhibitors of SARS-CoV and MERS-CoV Fusion. *J Virol* 90:8924–  
383 8933.
- 384 10. Sisk JM, Frieman MB, Machamer CE. 2018. Coronavirus S protein-induced fusion is  
385 blocked prior to hemifusion by Abl kinase inhibitors. *J Gen Virol* 1–12.
- 386 11. Roberts A, Deming D, Paddock CD, Cheng A, Yount B, Vogel L, Herman BD, Sheahan T,  
387 Heise M, Genrich GL, Zaki SR, Baric R, Subbarao K. 2007. A mouse-adapted SARS-  
388 coronavirus causes disease and mortality in BALB/c mice. *PLoS Pathog* 3:0023–0037.
- 389 12. Coleman CM, Frieman MB. 2015. Growth and Quantification of MERS-CoV Infection.  
390 *Curr Protoc Microbiol* 37:15E.2.1-15E.2.9.
- 391 13. Frieman M, Yount B, Agnihothram S, Page C, Donaldson E, Roberts A, Vogel L,  
392 Woodruff B, Scorpio D, Subbarao K, Baric RS. 2012. Molecular Determinants of Severe  
393 Acute Respiratory Syndrome Coronavirus Pathogenesis and Virulence in Young and  
394 Aged Mouse Models of Human Disease. *J Virol* 86:884–897.
- 395 14. Mingo RM, Simmons JA, Shoemaker CJ, Nelson EA, Schornberg KL, D’Souza RS,  
396 Casanova JE, White JM. 2015. Ebola Virus and Severe Acute Respiratory Syndrome  
397 Coronavirus Display Late Cell Entry Kinetics: Evidence that Transport to NPC1 +  
398 Endolysosomes Is a Rate-Defining Step. *J Virol* 89:2931–2943.
- 399 15. Pastick KA, Okafor EC, Wang F, Lofgren SM, Skipper CP, Nicol MR, Pullen MF,  
400 Rajasingham R, McDonald EG, Lee TC, Schwartz IS, Kelly LE, Lothar SA, Mitjà O,  
401 Letang E, Abassi M, Boulware DR. 2020. Review: Hydroxychloroquine and Chloroquine  
402 for Treatment of SARS-CoV-2 (COVID-19). *Open Forum Infect Dis*.
- 403 16. Wang LH, Rothberg KG, Anderson RGW. 1993. Mis-assembly of clathrin lattices on  
404 endosomes reveals a regulatory switch for coated pit formation. *J Cell Biol* 123:1107–



- 405 1117.
- 406 17. Baird JK. 2005. Effectiveness of antimalarial drugs. *N Engl J Med* 352.
- 407 18. Li W, Moore MJ, Vasllieva N, Sui J, Wong SK, Berne MA, Somasundaran M, Sullivan JL,  
408 Luzuriaga K, Greeneugh TC, Choe H, Farzan M. 2003. Angiotensin-converting enzyme 2  
409 is a functional receptor for the SARS coronavirus. *Nature* 426:450–454.
- 410 19. Zhou P, Yang X Lou, Wang XG, Hu B, Zhang L, Zhang W, Si HR, Zhu Y, Li B, Huang CL,  
411 Chen HD, Chen J, Luo Y, Guo H, Jiang R Di, Liu MQ, Chen Y, Shen XR, Wang X, Zheng  
412 XS, Zhao K, Chen QJ, Deng F, Liu LL, Yan B, Zhan FX, Wang YY, Xiao GF, Shi ZL.  
413 2020. A pneumonia outbreak associated with a new coronavirus of probable bat origin.  
414 *Nature* 579:270–273.
- 415 20. Wan Y, Shang J, Graham R, Baric RS, Li F. 2020. Receptor Recognition by the Novel  
416 Coronavirus from Wuhan: an Analysis Based on Decade-Long Structural Studies of  
417 SARS Coronavirus. *J Virol* 94.
- 418 21. Hoffmann M, Kleine-Weber H, Schroeder S, Krüger N, Herrler T, Erichsen S, Schiergens  
419 TS, Herrler G, Wu NH, Nitsche A, Müller MA, Drosten C, Pöhlmann S. 2020. SARS-CoV-  
420 2 Cell Entry Depends on ACE2 and TMPRSS2 and Is Blocked by a Clinically Proven  
421 Protease Inhibitor. *Cell* 181:271-280.e8.
- 422 22. Ziegler HK, Unanue ER. 1982. Decrease in macrophage antigen catabolism caused by  
423 ammonia and chloroquine is associated with inhibition of antigen presentation to T cells.  
424 *Proc Natl Acad Sci U S A* 79:175–178.
- 425 23. Al-Bari MAA. 2015. Chloroquine analogues in drug discovery: new directions of uses,  
426 mechanisms of actions and toxic manifestations from malaria to multifarious diseases. *J*  
427 *Antimicrob Chemother* 70:1608–21.
- 428 24. Rainsford KD, Parke AL, Clifford-Rashotte M, Kean WF. 2015. Therapy and  
429 pharmacological properties of hydroxychloroquine and chloroquine in treatment of  
430 systemic lupus erythematosus, rheumatoid arthritis and related diseases.

- 431 Inflammopharmacology 23:231–269.
- 432 25. Rockx B, Baas T, Zornetzer GA, Haagmans B, Sheahan T, Frieman M, Dyer MD, Teal  
433 TH, Proll S, van den Brand J, Baric R, Katze MG. 2009. Early Upregulation of Acute  
434 Respiratory Distress Syndrome-Associated Cytokines Promotes Lethal Disease in an  
435 Aged-Mouse Model of Severe Acute Respiratory Syndrome Coronavirus Infection. *J Virol*  
436 83:7062–7074.
- 437 26. Smits SL, De Lang A, Van Den Brand JMA, Leijten LM, Van Ijcken WF, Eijkemans MJC,  
438 Van Amerongen G, Kuiken T, Andeweg AC, Osterhaus ADME, Haagmans BL. 2010.  
439 Exacerbated innate host response to SARS-CoV in aged non-human primates. *PLoS*  
440 *Pathog* 6.
- 441 27. Channappanavar R, Perlman S. 2017. Pathogenic human coronavirus infections: causes  
442 and consequences of cytokine storm and immunopathology. *Semin Immunopathol*  
443 39:529–539.
- 444 28. Wang M, Cao R, Zhang L, Yang X, Liu J, Xu M, Shi Z, Hu Z, Zhong W, Xiao G. 2020.  
445 Remdesivir and chloroquine effectively inhibit the recently emerged novel coronavirus  
446 (2019-nCoV) in vitro. *Cell Res* 0.
- 447 29. Brown AJ, Won JJ, Graham RL, Dinnon KH, Sims AC, Feng JY, Cihlar T, Denison MR,  
448 Baric RS, Sheahan TP. 2019. Broad spectrum antiviral remdesivir inhibits human  
449 endemic and zoonotic deltacoronaviruses with a highly divergent RNA dependent RNA  
450 polymerase. *Antiviral Res* 169.
- 451 30. Sheahan TP, Sims AC, Graham RL, Menachery VD, Gralinski LE, Case JB, Leist SR,  
452 Pirc K, Feng JY, Trantcheva I, Bannister R, Park Y, Babusis D, Clarke MO, MacKman  
453 RL, Spahn JE, Palmiotti CA, Siegel D, Ray AS, Cihlar T, Jordan R, Denison MR, Baric  
454 RS. 2017. Broad-spectrum antiviral GS-5734 inhibits both epidemic and zoonotic  
455 coronaviruses. *Sci Transl Med* 9.
- 456

457

458

459 **Figure legend**

460 **Figure 1 – Percentage inhibition and percentage cytotoxicity graphs from drug screens**

461 **starting at 50  $\mu$ M using an 8-point, 1:2 dilution series.** Results from one representative drug

462 screen of three showing percentage inhibition and cytotoxicity for each of the tested drugs.

463 Triplicate wells of cells were pre-treated with the indicated drug for 2 hours prior to infection with

464 SARS-CoV-2 at MOI 0.01. Cells were incubated for 72 hours prior to performing CellTiter-Glo

465 assays to assess cytopathic effect. Data are scored as percentage inhibition of relative cell

466 viability for drug treated versus vehicle control. Data are the mean percentages with error bars

467 displaying standard deviation between the triplicate wells.

468

469 **Figure 2 – Hydroxychloroquine and chloroquine phosphate inhibit production of SARS-**

470 **CoV-2 N and RdRp mRNA.**

471 Vero cells were pre-treated with hydroxychloroquine (A, C and E) or chloroquine sulfate (B, D

472 and F) at the indicated concentration (or 0.1% water as vehicle control) for 2 h prior to infection

473 with SARS-CoV-2 (WA-1 strain) at MOI 0.1. 24 h post-infection cells were collected in TRIzol.

474 RNA was extracted from TRIzol sample and qRT-PCR was performed for viral RdRp (A and B)

475 or N (C and D) mRNA using WHO primers. RNA levels were normalized with 18S RNA and fold

476 change for drug treated to vehicle control was calculated (dotted line to denote a fold change of

477 1 which is no change over control). Data are from 3 independent infections performed on

478 triplicate wells, the fold change was calculated in each independent experiment and the mean

479 fold change is plotted with error bars displaying standard deviation. Along with TRIzol samples

480 for RNA supernatant was collected from cells and used for TCID<sub>50</sub> assays to determine

481 infectious virus production following treatment with HCQ (E) or CQ (F) Data are from 3

482 independent infections performed on triplicate wells with the TCID<sub>50</sub>/ml being averaged across

483 all wells. Error bars are the standard deviation. G) Cells were treated with 50  $\mu$ M HCQ or 0.1%  
484 water as control. Drug was either added 2 h prior to infection, at the time of infection or 2 h after  
485 infection with MOI 0.1 SARS-CoV-2. After 24 h infection, supernatant was collected and used  
486 for TCID<sub>50</sub> assays to determine infectious virus production. Data are from 3 independent  
487 infections performed on triplicate wells with the TCID<sub>50</sub>/ml being averaged across all wells. Error  
488 bars are the standard deviation. H) SARS-CoV spike psuedoviruses (PV) were used for  
489 infection of BSC1 cells. The cells were treated with 10  $\mu$ M of CQ or CPZ for 1 h prior to infection  
490 with PV for 3 h. The PV carry BlaM and cells were loaded with CCF2 to monitor cleavage and  
491 shift in fluorescence output for evidence of S-mediated entry into cells. Data are normalised to  
492 PV alone and are from 3 independent experiments with error bars representing standard  
493 deviation.

494

495 **Figure 3 – Antiviral activity of additional FDA approved compounds against SARS-CoV-2.**

496 Other drugs that showed antiviral activity in our initial CellTiter-Glo screening were tested for  
497 inhibition of productive virus infection. Cells were treated with the indicated concentrations of A)  
498 amodiaquine dihydrochloride dihydrate, B) amodiaquine hydrochloride, C) chlorpromazine, D)  
499 mefloquine and E) imatinib for 2 h prior to infection with SARS-CoV-2 at MOI 0.1 for 24 h.  
500 Supernatant was collected and used for TCID<sub>50</sub> assay to quantify infectious virus production.  
501 Data are from a representative experiment of four performed on triplicate wells. Data are the  
502 mean TCID<sub>50</sub>/ml with error bars being standard deviation.

503

504 **Figure 4 – CQ and CPZ are protective against SARS-CoV (MA15) infection *in vivo***

505 Mice were treated with CQ or CPZ 1 day prior to infection with SARS-CoV (MA15) and dosed  
506 with each drug across the 4 day infection time course. Water was used as the vehicle control for  
507 both drugs and PBS was used as a control for uninfected mice. A) Weight loss of mice treated  
508 with CQ at two different dose levels (0.8 mg and 1.6 mg) over the 4 day infection. Data are

509 presented as relative weight loss compared to the mouse weight on day 0. In each treatment  
510 group there were 5 mice and the data are mean average and standard deviation. B) At day 4,  
511 mice were euthanized and lung sections were used for H&E staining. C) In addition to collecting  
512 lungs for section staining, there was also collection to determine titer of virus by plaque assay.  
513 D) Weight loss of mice treated with CPZ at three different doses (20 µg, 100 µg, and 200 µg)  
514 with the same experimental set up as in A. E and F) As B and C but for CPZ treated mice.

515

516 **Table 1** - IC50 and CC50 values for 20 FDA approved drugs against SARS-CoV-2.

517 Abbreviations: MOI (multiplicity of infection), IC50 (half maximal inhibitory concentration), CC50  
518 (half maximal cytotoxic concentration), avg. (average), ND (not determined).

519 A – Run totals listed as IC50,CC50

520 B – At least one CC50 could be extrapolated from the curve fit suggesting toxicity and SI are  
521 slightly higher than listed

522 C – No CC50 could be extrapolated from the curve fit suggesting toxicity and SI are much  
523 higher than listed.

524

525 **Figure 1**

526

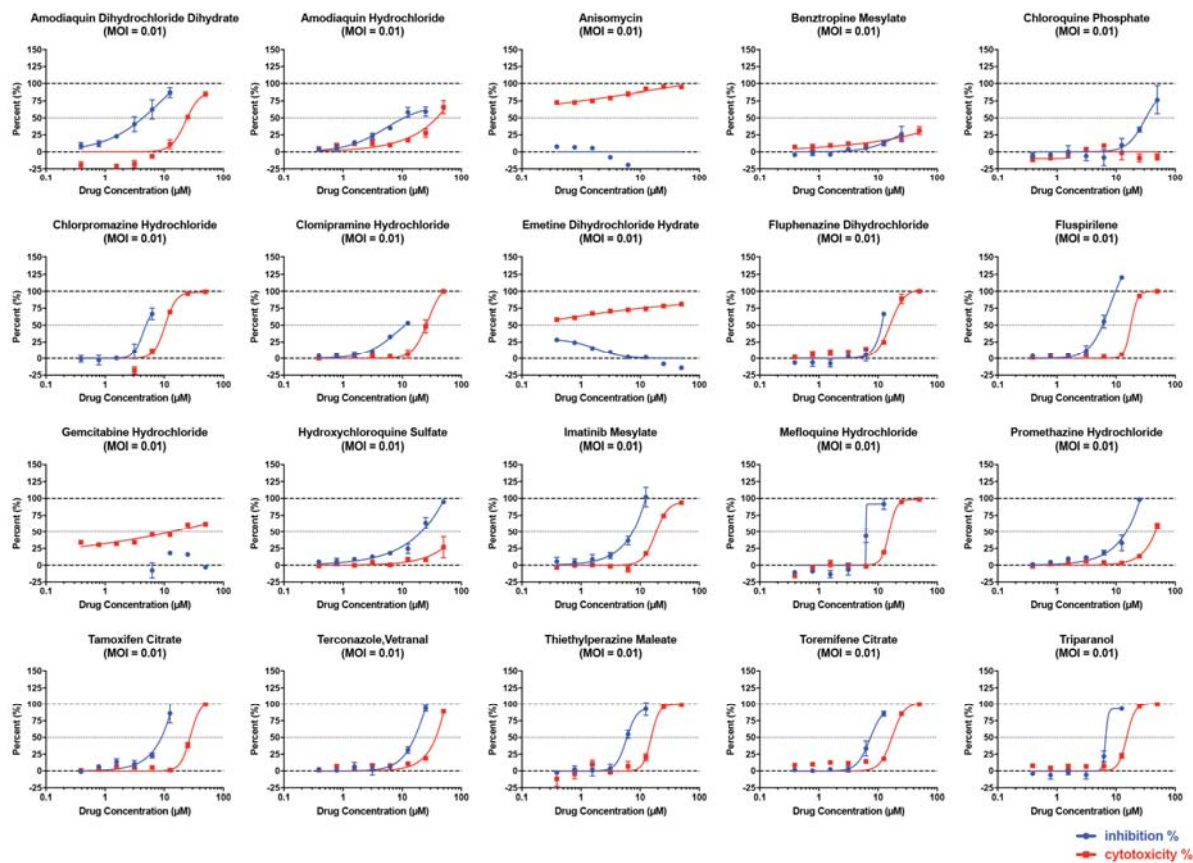

527

528 **Figure 2**

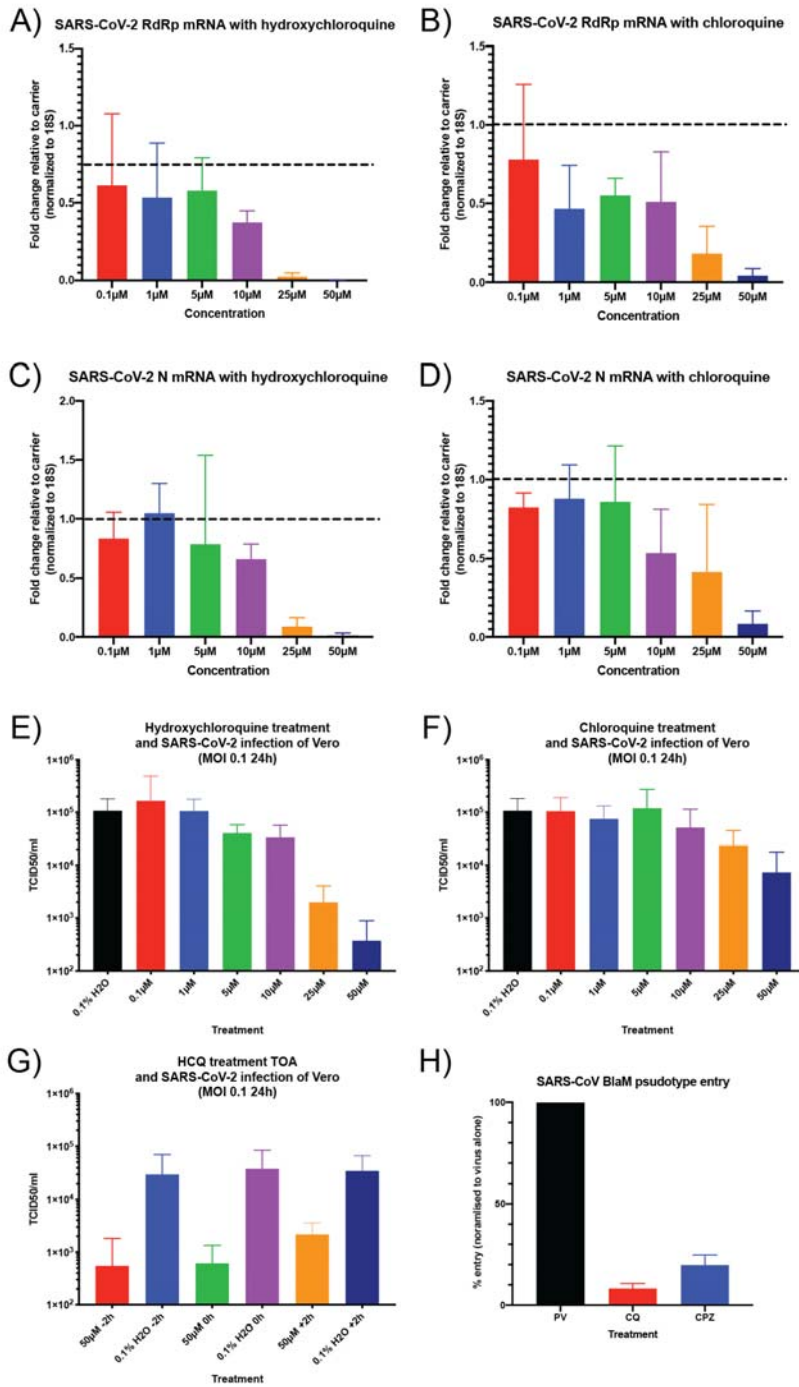

529

530

531 **Figure 3**

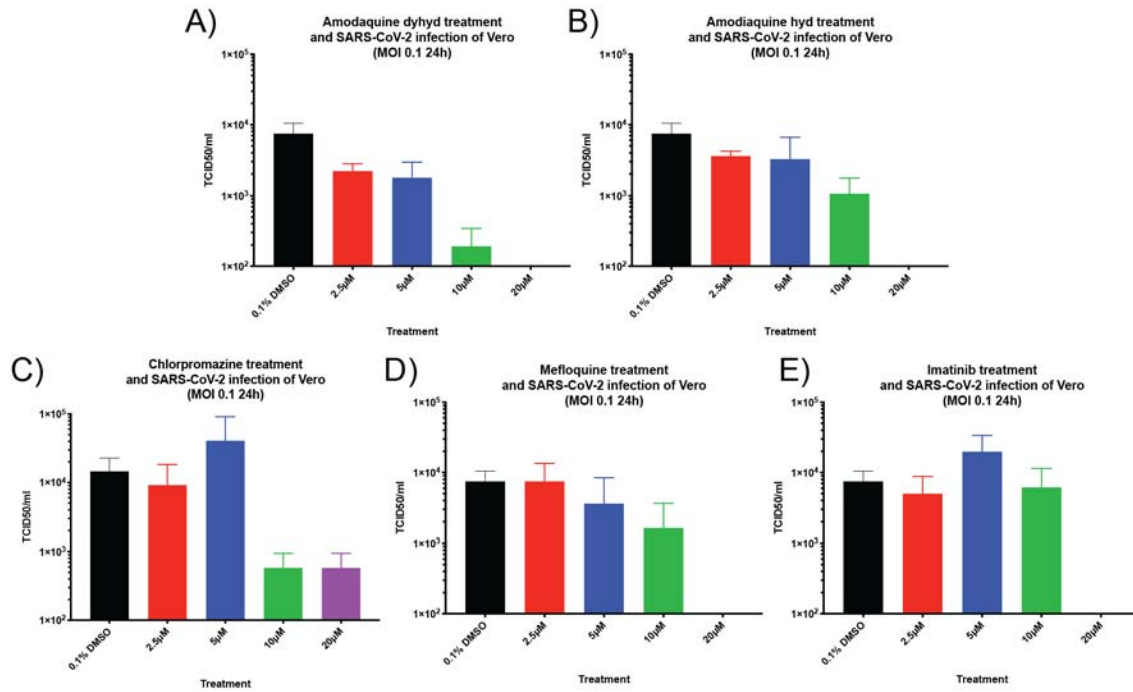

532

533

534 **Figure 4**



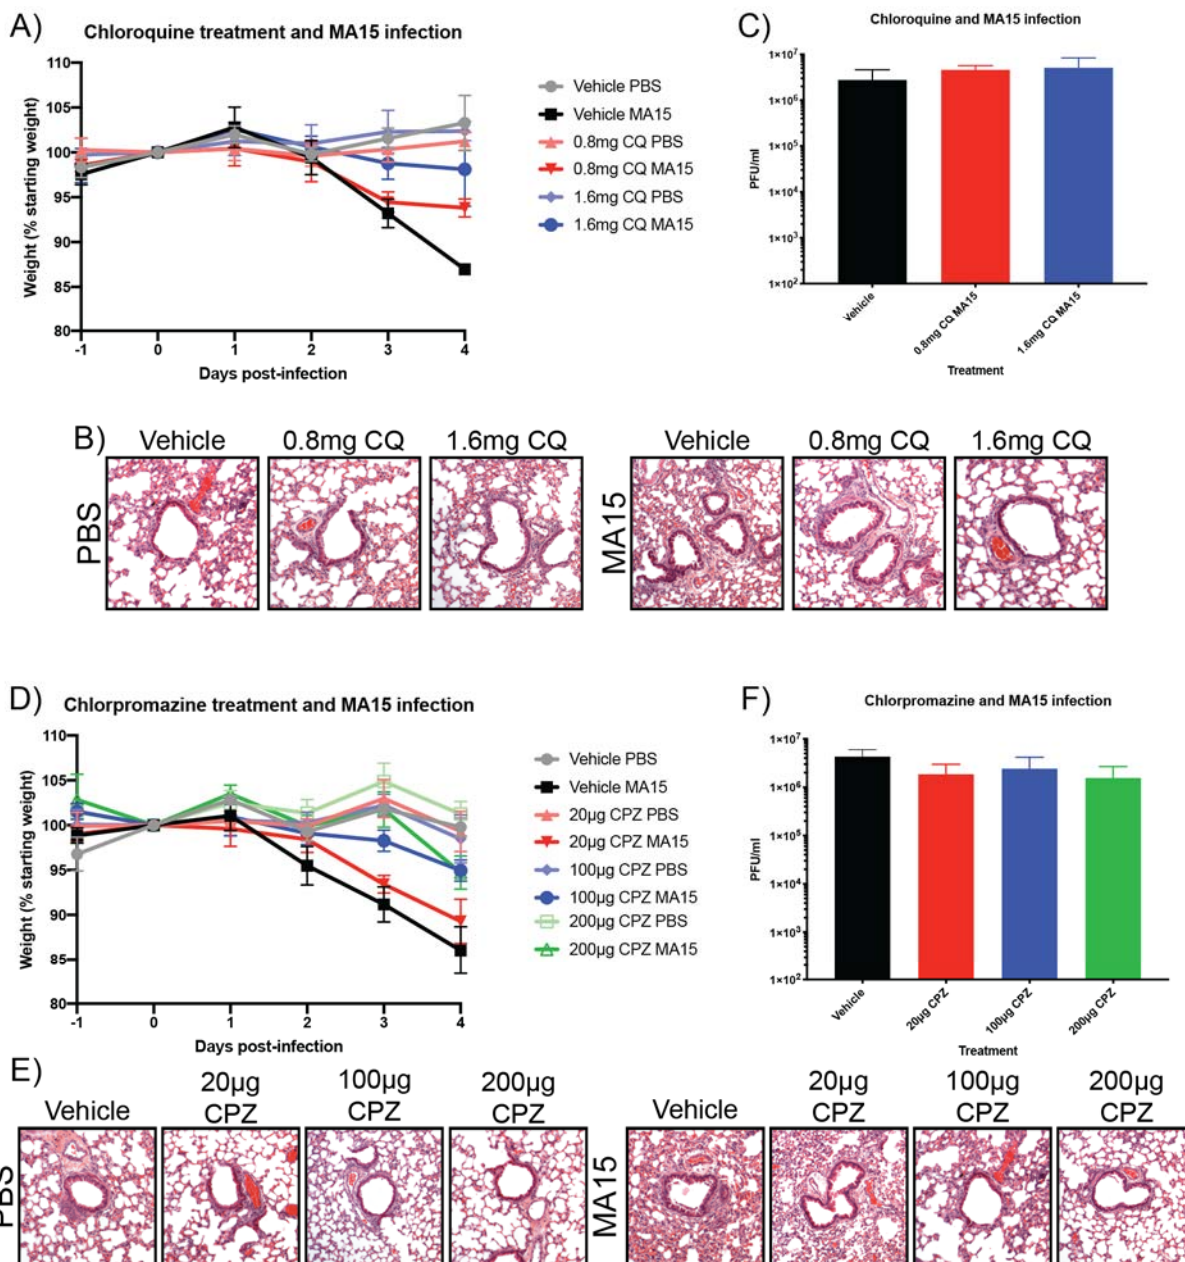

535
